# Supplementary material
Source: PubMed Central journal article supplement (PMC9765003)
Supplement: mmc1.pdf [file mmc1.pdf]

# THE LANCET

## Child & Adolescent Health

### Supplementary appendix

This appendix formed part of the original submission and has been peer reviewed.  
We post it as supplied by the authors.

Supplement to: Tagarro A, García-Salido A, Martínez E-V, Vega-Piris L, Mellado MJ.  
Low COVID-19 mortality in Spanish children. *Lancet Child Adolesc Health* 2021;  
published online April 14. [http://dx.doi.org/10.1016/S2352-4642\(21\)00125-5](http://dx.doi.org/10.1016/S2352-4642(21)00125-5).

| Number | Age (years) | Primary diagnosis    | Comorbidities                                                               | Significant Immunosuppression | Codetection type                          |
|--------|-------------|----------------------|-----------------------------------------------------------------------------|-------------------------------|-------------------------------------------|
| 1      | 0.3         | Pneumonia-ARDS       | Niemann-Pick type C                                                         | No                            | N/A                                       |
| 2      | 0.5         | Pneumonia and sepsis | Myocardiorpathy                                                             | No                            | N/A                                       |
| 3      | 5.5         | Pneumonia and sepsis | Bronchopulmonary dysplasia                                                  | No                            | <i>E. faecalis</i>                        |
| 4      | 8.4         | Pneumonia            | Hematopoietic stem cell transplantation, congenital STAT3 deficiency.       | Yes                           | <i>S. epidermis</i> · <i>C. difficile</i> |
| 5      | 8.5         | Pneumonia            | Hematopoietic stem cell transplantation, severe congenital immunodeficiency | Yes                           | <i>VHS-1</i>                              |

|    |      |                      |                                                            |     |                                     |
|----|------|----------------------|------------------------------------------------------------|-----|-------------------------------------|
| 6  | 11·6 | MIS-C                | Hematopoietic stem cell transplantation, Acute Leukaemia B | Yes | <i>Influenza B, parainfluenza 1</i> |
| 7  | 11·8 | Pneumonia and sepsis | Dermatomyositis                                            | Yes | <i>E. Faecium</i>                   |
| 8  | 12·5 | MIS-C                | Overweight                                                 | No  | N/A                                 |
| 9  | 15·5 | MIS-C                | Malignant neoplasm                                         | Yes | N/A                                 |
| 10 | 17   | ARDS                 | Diffuse B Mediastinal Lymphoma                             | Yes | N/A                                 |

**Table 1. Clinical features of children died with SARS-CoV-2 infection recorded in the National Registry of Covid-19 in Spanish Children of the Spanish Pediatric Association (EPICO-AEP) and the Registry of children with SARS-Cov2 infection admitted to Pediatric Intensive Care Units of the Spanish Society of Pediatric Intensive Care (SECIP). At least 5 more children have been identified by the coordination of the registries, at least 3 of them with serious prior comorbidities. However, they were not included in any of the clinical registries for different reasons, including lack of consent. MIS-C: Multiinflammatory syndrome associated with Covid-19. ARDS: Acute Respiratory Distress Syndrome.**
